# Supplementary material for: Choroidal and Retinal Thickness and Axial Eye Elongation in Chinese Junior Students
Source: PubMed Central journal article supplement — Invest Ophthalmol Vis Sci. 2021 Jul 19;62(9):26. doi: 10.1167/iovs.62.9.26 (PMC8297418; doi:10.1167/iovs.62.9.26), 2021-07-19

**Table S1** Differences of the one-year axial elongation among quartiles of choroidal and retinal

| Parameters                    | thickness in non-myopic students |              |                                |              |
|-------------------------------|----------------------------------|--------------|--------------------------------|--------------|
|                               | Difference (95%CI),<br>Model 1   | <i>P</i>     | Difference (95%CI),<br>Model 2 | <i>P</i>     |
| Subfoveal choroidal thickness |                                  |              |                                |              |
| Q1 (98~220μm)                 | 54.15(-35.63, 143.94)            | 0.235        | 46.48(-45.19, 138.15)          | 0.318        |
| Q2 (220~262μm)                | -17.35(-91.11, 56.42)            | 0.642        | -19.80(-94.20, 54.61)          | 0.599        |
| Q3 (262~317μm)                | -10.93(-65.36, 43.51)            | 0.692        | -10.41(-66.55, 45.74)          | 0.714        |
| Q4 (317~513μm)                | 0.00 (Reference)                 |              | 0.00 (Reference)               |              |
| Nasal choroidal thickness     |                                  |              |                                |              |
| Q1 (45~124μm)                 | <b>93.22(8.24, 178.21)</b>       | <b>0.032</b> | <b>93.49(5.26, 181.71)</b>     | <b>0.038</b> |
| Q2 (124~155μm)                | 10.53(-61.87, 82.94)             | 0.774        | 5.20(-70.22, 80.63)            | 0.892        |
| Q3 (155~190μm)                | 22.88(-38.17, 83.94)             | 0.459        | 8.92(-56.38, 74.23)            | 0.787        |
| Q4 (190~410μm)                | 0.00 (Reference)                 |              | 0.00 (Reference)               |              |
| Temporal choroidal thickness  |                                  |              |                                |              |
| Q1 (87~237μm)                 | 2.21(-118.20, 122.62)            | 0.971        | -3.14(-125.25, 118.98)         | 0.960        |
| Q2 (237~276μm)                | -58.62(-132.49, 15.25)           | 0.119        | -56.06(-130.92, 18.81)         | 0.141        |
| Q3 (276~317μm)                | -27.89(-90.02, 34.25)            | 0.376        | -25.93(-90.22, 38.35)          | 0.425        |
| Q4 (317~685μm)                | 0.00 (Reference)                 |              | 0.00 (Reference)               |              |
| Subfoveal retinal thickness   |                                  |              |                                |              |
| Q1 (176~205μm)                | 33.04(-22.51, 88.60)             | 0.242        | 27.19(-29.90, 84.28)           | 0.349        |
| Q2 (205~215μm)                | <b>82.24(21.99, 142.48)</b>      | <b>0.008</b> | <b>81.20(19.98, 142.41)</b>    | <b>0.010</b> |
| Q3 (215~225μm)                | 25.42(-34.83, 85.66)             | 0.406        | 17.92(-44.67, 80.50)           | 0.573        |
| Q4 (225~290μm)                | 0.00 (Reference)                 |              | 0.00 (Reference)               |              |
| Nasal retinal thickness       |                                  |              |                                |              |
| Q1 (247~285μm)                | 51.41(-11.78, 114.59)            | 0.110        | 61.41(-3.73, 126.55)           | 0.064        |
| Q2 (285~296μm)                | -55.33(-113.83, 3.17)            | 0.064        | -51.21(-111.09, 8.67)          | 0.093        |
| Q3 (296~310μm)                | -5.61(-58.70, 47.48)             | 0.835        | -0.10(-53.94, 53.74)           | 0.997        |
| Q4 (310~403μm)                | 0.00 (Reference)                 |              | 0.00 (Reference)               |              |
| Temporal retinal thickness    |                                  |              |                                |              |
| Q1 (179~252μm)                | <b>73.26(1.96, 144.56)</b>       | <b>0.044</b> | <b>71.92(0.19, 143.65)</b>     | <b>0.049</b> |
| Q2 (252~260μm)                | <b>67.78(12.84, 122.72)</b>      | <b>0.016</b> | <b>71.07(15.50, 126.63)</b>    | <b>0.013</b> |
| Q3 (260~270μm)                | 12.69(-41.11, 66.50)             | 0.642        | 24.25(-31.11, 79.60)           | 0.388        |
| Q4 (279~369μm)                | 0.00 (Reference)                 |              | 0.00 (Reference)               |              |

Model 1: unadjusted ANOVA;

Model 2: linear regression model adjusting for sex, age and height;

Bold indicates statistically significant.

**Table S2** Differences of the one-year axial elongation among quartiles of choroidal and retinal thickness with in myopic students

| Parameters                    | Difference (95%CI),<br>Model 1 | <i>P</i>     | Difference (95%CI),<br>Model 2 | <i>P</i>     |
|-------------------------------|--------------------------------|--------------|--------------------------------|--------------|
| Subfoveal choroidal thickness |                                |              |                                |              |
| Q1 (98~220μm)                 | 19.82(-6.77, 46.41)            | 0.144        | 18.75(-7.55, 45.06)            | 0.162        |
| Q2 (220~262μm)                | 9.43(-17.30, 36.17)            | 0.489        | 8.44(-17.99, 34.87)            | 0.531        |
| Q3 (262~317μm)                | 4.89(-22.21, 31.99)            | 0.723        | 2.48(-24.40, 29.37)            | 0.856        |
| Q4 (317~513μm)                | 0.00 (Reference)               |              | 0.00 (Reference)               |              |
| Nasal choroidal thickness     |                                |              |                                |              |
| Q1 (45~124μm)                 | 10.62(-17.28, 38.51)           | 0.455        | 6.85(-20.94, 34.63)            | 0.629        |
| Q2 (124~155μm)                | 17.61(-10.93, 46.16)           | 0.226        | 15.55(-12.88, 43.97)           | 0.283        |
| Q3 (155~190μm)                | 13.47(-15.29, 42.23)           | 0.358        | 8.17(-20.54, 36.87)            | 0.577        |
| Q4 (190~410μm)                | 0.00 (Reference)               |              | 0.00 (Reference)               |              |
| Temporal choroidal thickness  |                                |              |                                |              |
| Q1 (87~237μm)                 | <b>34.71(6.60, 62.83)</b>      | <b>0.016</b> | <b>34.75(6.85, 62.66)</b>      | <b>0.015</b> |
| Q2 (237~276μm)                | 15.79(-12.70, 44.29)           | 0.277        | 14.18(-14.09, 42.44)           | 0.325        |
| Q3 (276~317μm)                | 24.99(-4.22, 54.20)            | 0.093        | 24.54(-4.53, 53.62)            | 0.098        |
| Q4 (317~685μm)                | 0.00 (Reference)               |              | 0.00 (Reference)               |              |
| Subfoveal retinal thickness   |                                |              |                                |              |
| Q1 (176~205μm)                | 0.77(-23.75, 25.28)            | 0.951        | 1.73(-22.65, 26.11)            | 0.889        |
| Q2 (205~215μm)                | 0.44(-25.34, 26.21)            | 0.973        | 1.69(-24.07, 27.45)            | 0.897        |
| Q3 (215~225μm)                | -7.33(-32.93, 18.27)           | 0.574        | -6.27(-31.70, 19.16)           | 0.629        |
| Q4 (225~290μm)                | 0.00 (Reference)               |              | 0.00 (Reference)               |              |
| Nasal retinal thickness       |                                |              |                                |              |
| Q1 (247~285μm)                | 16.28(-11.56, 44.12)           | 0.252        | 18.91(-8.97, 46.79)            | 0.183        |
| Q2 (285~296μm)                | 1.04(-27.68, 29.77)            | 0.943        | 3.07(-25.54, 31.67)            | 0.833        |
| Q3 (296~310μm)                | -4.68(-33.13, 23.78)           | 0.747        | -0.82(-29.19, 27.54)           | 0.955        |
| Q4 (310~403μm)                | 0.00 (Reference)               |              | 0.00 (Reference)               |              |
| Temporal retinal thickness    |                                |              |                                |              |
| Q1 (179~252μm)                | <b>43.06(15.83, 70.28)</b>     | <b>0.002</b> | <b>46.44(18.74, 74.14)</b>     | <b>0.001</b> |
| Q2 (252~260μm)                | <b>30.08(1.52, 58.63)</b>      | <b>0.039</b> | <b>29.67(1.18, 58.15)</b>      | <b>0.041</b> |
| Q3 (260~270μm)                | <b>42.88(14.53, 71.22)</b>     | <b>0.003</b> | <b>43.35(15.20, 71.50)</b>     | <b>0.003</b> |
| Q4 (279~369μm)                | 0.00 (Reference)               |              | 0.00 (Reference)               |              |

Model 1: unadjusted ANOVA;

Model 2: linear regression model adjusting for sex, age and height;

Bold indicates statistically significant.

**Figure S1** Structural equation model about the association of choroidal (A) and retinal thickness (B) with the one-year axial elongation. † Non-myopic group. †† Myopic group. Model was adjusted for sex, age and height. Following the standard conventions, latent variables were portrayed as oval and manifest variables were portrayed as rectangles. E, error of the variables.

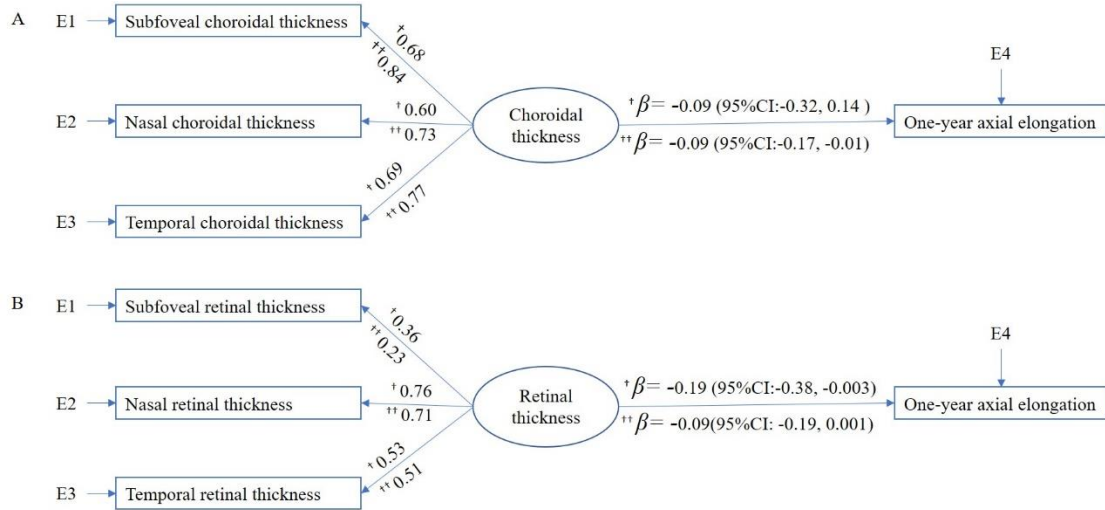

**Figure S2** The distribution of one-year axial elongation stratified by quartiles of choroidal thickness and retinal thickness at baseline in non-myopic students. (A) Subfoveal choroidal thickness; (B) Nasal choroidal thickness; (C) Temporal choroidal thickness; (D) Subfoveal retinal thickness; (E) Nasal retinal thickness; (F) Temporal retinal thickness. \*The difference between groups is statistically significant.

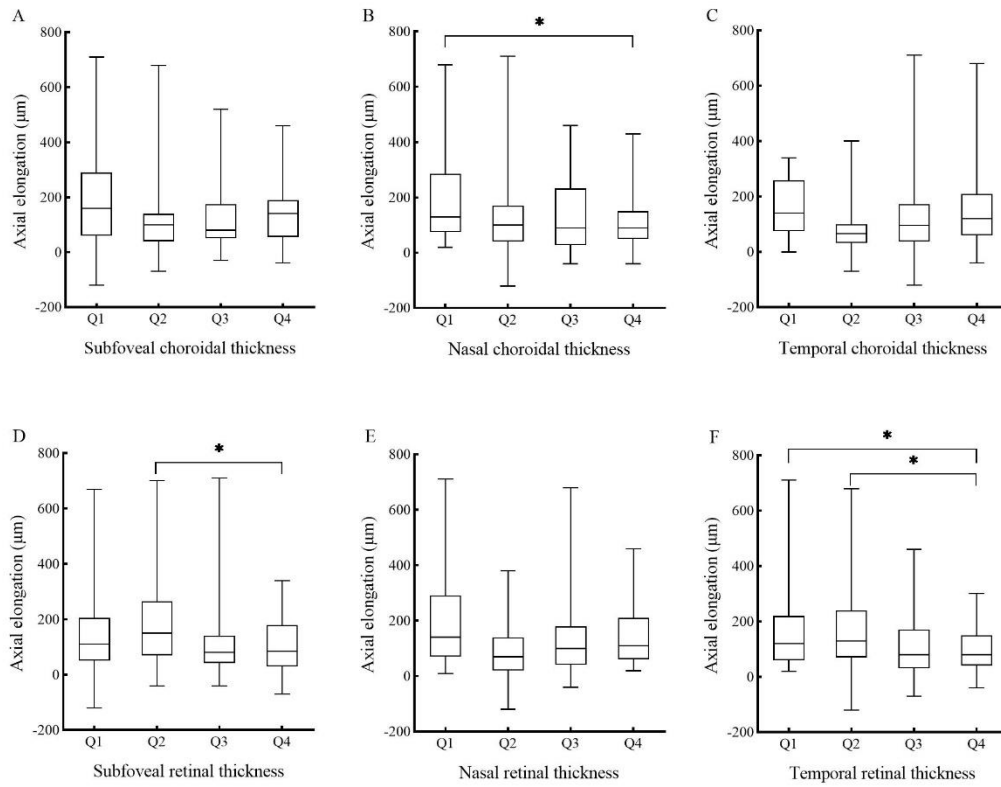

**Figure S3** The distribution of one-year axial elongation stratified by quartiles of choroidal thickness and retinal thickness at baseline in myopic students. (A) Subfoveal choroidal thickness; (B) Nasal choroidal thickness; (C) Temporal choroidal thickness; (D) Subfoveal retinal thickness; (E) Nasal retinal thickness; (F) Temporal retinal thickness. \*The difference between groups is statistically significant.

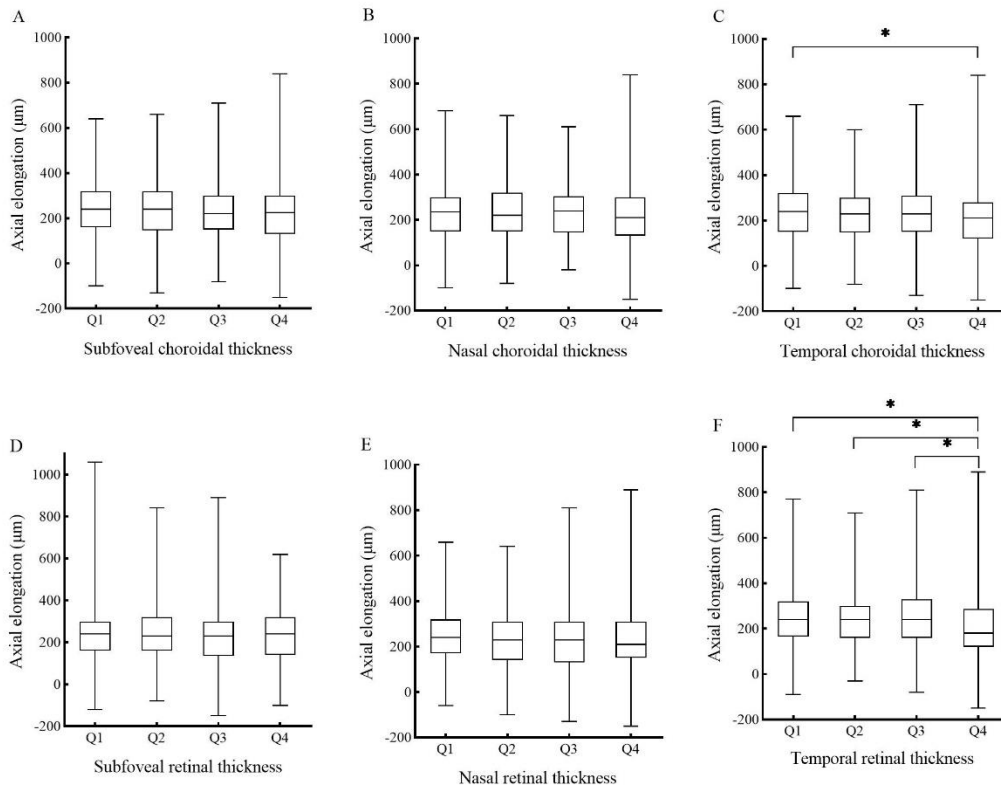

Supplement: iovs-62-9-26_s001.pdf [file iovs-62-9-26_s001.pdf]
